# Supplementary material
Source: publisher site journal article supplement (https://www.dovepress.com/article/178531)

## **Supplementary material**

### **Matched cohort study of therapeutic strategies to prevent preschool wheezing/asthma attacks**

Jonathan Grigg, Anjan Nibber, James Y. Paton, Alison Chisholm, Theresa W. Guilbert, Alan Kaplan, Steve Turner, Nicolas Roche, Elizabeth V. Hillyer, David B. Price, on behalf of the Respiratory Effectiveness Group

### **Collaborators from the Small Airways and Childhood Health Working Groups, Respiratory Effectiveness Group**

**Willem M. C. van Aalderen**, Department of Pediatric Respiratory Medicine and Allergy, Emma Children's Hospital AMC, Amsterdam, the Netherlands

**Clare S. Murray**, Division of Infection, Immunity and Respiratory Medicine, Manchester Academic Health Science Centre, The University of Manchester, University Hospital of South Manchester, and Royal Manchester Children's Hospital, Manchester, UK

**Wanda Phipatanakul**, Division of Allergy and Immunology, Boston Children's Hospital, and Harvard Medical School, Boston, MA

**Samatha Sonnappa**, Department of Respiratory Paediatrics, Rainbow Children's Hospital, Bengaluru, India, and Observational and Pragmatic Research Institute Pte Ltd, Singapore

**Teoh Oon Hoe**, Department of Paediatrics, Respiratory Medicine Service, KK Women's and Children's Hospital, Singapore

**Richard J. Martin**, Department of Medicine, National Jewish Health, and University of Colorado Denver, Denver, CO

**Alberto Papi**, Department of Respiratory Medicine, University Hospital S. Anna, Ferrara, Italy

**Stanley J. Szefler**, Breathing Institute, Children's Hospital Colorado, University of Colorado School of Medicine, Aurora, CO, USA

**Derek Skinner**, Optimum Patient Care, Cambridge, UK

**R. Brett McQueen**, University of Colorado Skaggs School of Pharmacy and Pharmaceutical Sciences, Aurora, CO, USA

**Omar S. Usmani**, Airway Disease Section, National Heart and Lung Institute, Imperial College London, and Royal Brompton Hospital, London, UK

## Supplementary methods

The Optimum Patient Care Research Database (OPCRD) is a database containing anonymized, longitudinal medical record data in the UK, where patients' electronic medical records, incorporating primary, secondary, and hospitalization care data, are centralized at their primary care practices.<sup>S1</sup> Used frequently in clinical research, the OPCRD contained anonymized data for 2.5 million patients at the time of this study, including about 750,000 patients with asthma from 525 primary care practices across England, Scotland, Wales, and Northern Ireland.

The study was conducted in compliance with all applicable local and international regulations and to standards suggested for observational studies, including an independent advisory group, use of an *a priori* analysis plan, study registration with commitment to publish, and a well-maintained and monitored study database.<sup>S2</sup> The OPCRD is approved by the Health Research Authority of the UK NHS for clinical research use (REC reference: 15/EM/0150). The protocol for this study was approved by the Anonymised Data Ethics Protocols and Transparency (ADEPT) committee, the independent scientific advisory committee for the OPCRD (ADEPT approval code, ADEPT0415), and the study protocol was registered with the European Network of Centres for Pharmacoepidemiology and Pharmacovigilance (ENCePP registration number EUPAS10684).<sup>S3,S4</sup> The protocol, analyses, and dissemination of the results were approved by an independent steering committee comprising members of the Small Airways Study Group and the Child Health Working Group of the Respiratory Effectiveness Group (REG),<sup>S5</sup> a not-for-profit research and advocacy organization dedicated to furthering real-life clinical research. The study period was January 1988 to May 2015, with index dates from January 3, 1989, to May 28, 2014.

The diagnostic Read codes used to identify wheezing episodes during the baseline year were as follows:

| Read Code | Read Term                   | Sub Read Code |
|-----------|-----------------------------|---------------|
| • 1737.00 | Wheezing                    | 1737.         |
| • 1737.11 | Wheezing symptom            | 1737.         |
| • 173B.00 | Nocturnal cough / wheeze    | 173B.         |
| • 173e.00 | Viral wheeze                | 173e.         |
| • 173e.11 | Viral induced wheeze        | 173e.         |
| • 2326.00 | O/E - expiratory wheeze     | 2326          |
| • 6635.00 | Increasing exercise wheeze  | 6635          |
| • H060.11 | Acute wheezy bronchitis     | H060.         |
| • H30..12 | Recurrent wheezy bronchitis | H30..         |
| • H302.00 | Wheezy bronchitis           | H302.         |
| • H312011 | Chronic wheezy bronchitis   | H3120         |
| • R060900 | [D]Wheezing                 | R0609         |

Secondary endpoints included acute respiratory events, risk-domain asthma control, and treatment stability, all composite endpoints defined and reported in Table S1 below, as utilized in prior studies by the authors.<sup>S6-S8</sup> Treatment failure, defined as addition of new therapy or  $\geq 50\%$  increase in the dose of the index date therapy, was included in two secondary analyses: (1) in the analysis of time to first wheezing/asthma attack (supplementary Figure S5), children who experienced treatment failure before their first wheezing/asthma attack were censored at 7 days after the date of treatment failure. In addition, the inverse of treatment failure (ie, no additional therapy during the outcome year) was included as part of the “treatment stability” endpoint, defined in supplementary Table S1.

The occurrence of pneumonia, recorded as a diagnostic Read code was an exploratory endpoint. In addition, for the two controller comparisons (LTRA vs. ICS and EF ICS vs. fine-particle ICS), we calculated the asthma medication ratio, defined as the total number of controller units (ICS inhalers and 30-day LTRA prescriptions) divided by total controller plus reliever units (SABA inhalers). A ratio of  $\geq 0.5$  is considered appropriate prescribing for asthma management.<sup>S9,S10</sup>

**Table S1.** Definitions of secondary composite endpoints

---

Acute respiratory event, defined as the occurrence of any of the following:

- Asthma-related hospital admission or ED attendance,<sup>a</sup> *or*
- An acute course of oral corticosteroids (coded for asthma),<sup>b</sup> *or*
- Antibiotics prescribed with a lower respiratory consultation.

Risk-domain asthma control, includes *all* of the following:

- No asthma-related hospital admission, ED attendance, or outpatient department attendance, *and*
- No acute oral corticosteroid prescription with a lower respiratory consultation, *and*
- No antibiotics prescribed with a lower respiratory consultation.

Treatment stability, includes *all* of the following:

- Achievement of risk-domain asthma control (see above), *and*
- No additional therapy during the outcome year, as:
  - $\geq 50\%$  increase in ICS dose over that prescribed at the index date, *and/or*
  - Use of additional therapy as LABA, LTRA, or theophylline

---

**Notes:** <sup>a</sup>Asthma-related hospital attendance/admission or ED attendance included events associated with any asthma code or recorded on the same day as a lower respiratory consultation.

<sup>b</sup>Acute oral corticosteroids were defined as: (a) all courses that were definitely not maintenance therapy; and/or (b) all courses where dosing instructions suggested wheezing/asthma attack (exacerbation) treatment (e.g. 6,5,4,3,2,1 reducing, or 30 mg as directed); and/or (c) all courses with no dosing instructions, but unlikely to be maintenance therapy because of prescription strength or frequency of prescriptions. Maintenance therapy was defined as prescriptions with daily dosing instructions of  $\leq 10$ mg prednisolone or prescriptions for 1 mg or 2.5 mg prednisolone tablets where daily dosing instructions were not available.

**Abbreviations:** ED, emergency department; ICS, inhaled corticosteroid; LABA, long-acting  $\beta_2$ -agonist; LTRA, leukotriene receptor antagonist; SABA, short-acting  $\beta_2$ -agonist.

### **Cohort matching**

Cohort matching was conducted by exact matching on key demographic, clinical, and baseline year variables. The selection of matching variables was informed by expert clinical advice and previous research experience, as previously reported.<sup>S6-S8,S11</sup> Different matching ratios were evaluated, and the ratios were chosen to maximize the numbers of patients in each cohort, with the goal of optimizing statistical power. Supplementary Figures S1–S4 depict the sequence in which matching criteria were applied, one variable at a time: namely, age on the index date (in years), sex, year of the index date, mean daily number of SABA doses (2 puffs, or 200 µg) during the baseline year, wheezing/asthma attacks during the baseline year (yes/no), acute antibiotic prescriptions during the baseline year (yes/no), and ever-recorded eczema (yes/no). The final step was the random selection of matched pairs, excluding duplicate matches, through the use of custom software (Figures S1–S4).

## References

- S1. Optimum Patient Care Research Database (OPCRD). <http://opcrd.co.uk/>. Accessed October 26, 2018.
- S2. Roche N, Reddel H, Martin R, et al. Quality standards for real-world research. Focus on observational database studies of comparative effectiveness. *Ann Am Thorac Soc*. 2014;11 Suppl 2:S99–S104.
- S3. The European Union electronic Register of Post-Authorisation Studies (EU PAS Register). <http://www.encepp.eu/encepp/studiesDatabase.jsp>. Accessed October 26, 2018.
- S4. Study registration: preschool wheeze. European Network of Centres for Pharmacoepidemiology and Pharmacovigilance (ENCePP). <http://www.encepp.eu/encepp/viewResource.htm?id=11153>. Accessed October 26, 2018.
- S5. Respiratory Effectiveness Group (REG). <http://www.effectivenessevaluation.org/>. Accessed October 26, 2018.
- S6. van Aalderen WM, Grigg J, Guilbert TW, et al. Small-particle inhaled corticosteroid as first-line or step-up controller therapy in childhood asthma. *J Allergy Clin Immunol Pract*. 2015;3(5):721–731 e716.
- S7. Colice G, Martin RJ, Israel E, et al. Asthma outcomes and costs of therapy with extrafine beclomethasone and fluticasone. *J Allergy Clin Immunol*. 2013;132(1):45–54 e10.
- S8. Price D, Martin RJ, Barnes N, et al. Prescribing practices and asthma control with hydrofluoroalkane-beclomethasone and fluticasone: a real-world observational study. *J Allergy Clin Immunol*. 2010;126(3):511–518 e511–510.
- S9. Laforest L, Licaj I, Devouassoux G, Chatte G, Martin J, Van Ganse E. Asthma drug ratios and exacerbations: claims data from universal health coverage systems. *Eur Respir J*. 2014;43:1378–1386.
- S10. Schatz M, Zeiger RS, Vollmer WM, et al. The controller-to-total asthma medication ratio is associated with patient-centered as well as utilization outcomes. *Chest*. 2006;130(1):43–50.
- S11. Burden A, Roche N, Miglio C, et al. An evaluation of exact matching and propensity score methods as applied in a comparative effectiveness study of inhaled corticosteroids in asthma. *Pragmatic Obs Res*. 2017;8:15–30.

**Figure S1** Patient flow chart: inhaled corticosteroid (ICS) vs. short-acting  $\beta$ -agonist (SABA) comparison. The numbers for the ICS cohort represent the actual number of children, while the numbers for the SABA cohort represent the number of medical records with different potential index dates for matching (there were 12,373 eligible children in the SABA cohort). The final step was the random selection of matched pairs, excluding duplicate matches, through the use of custom software.

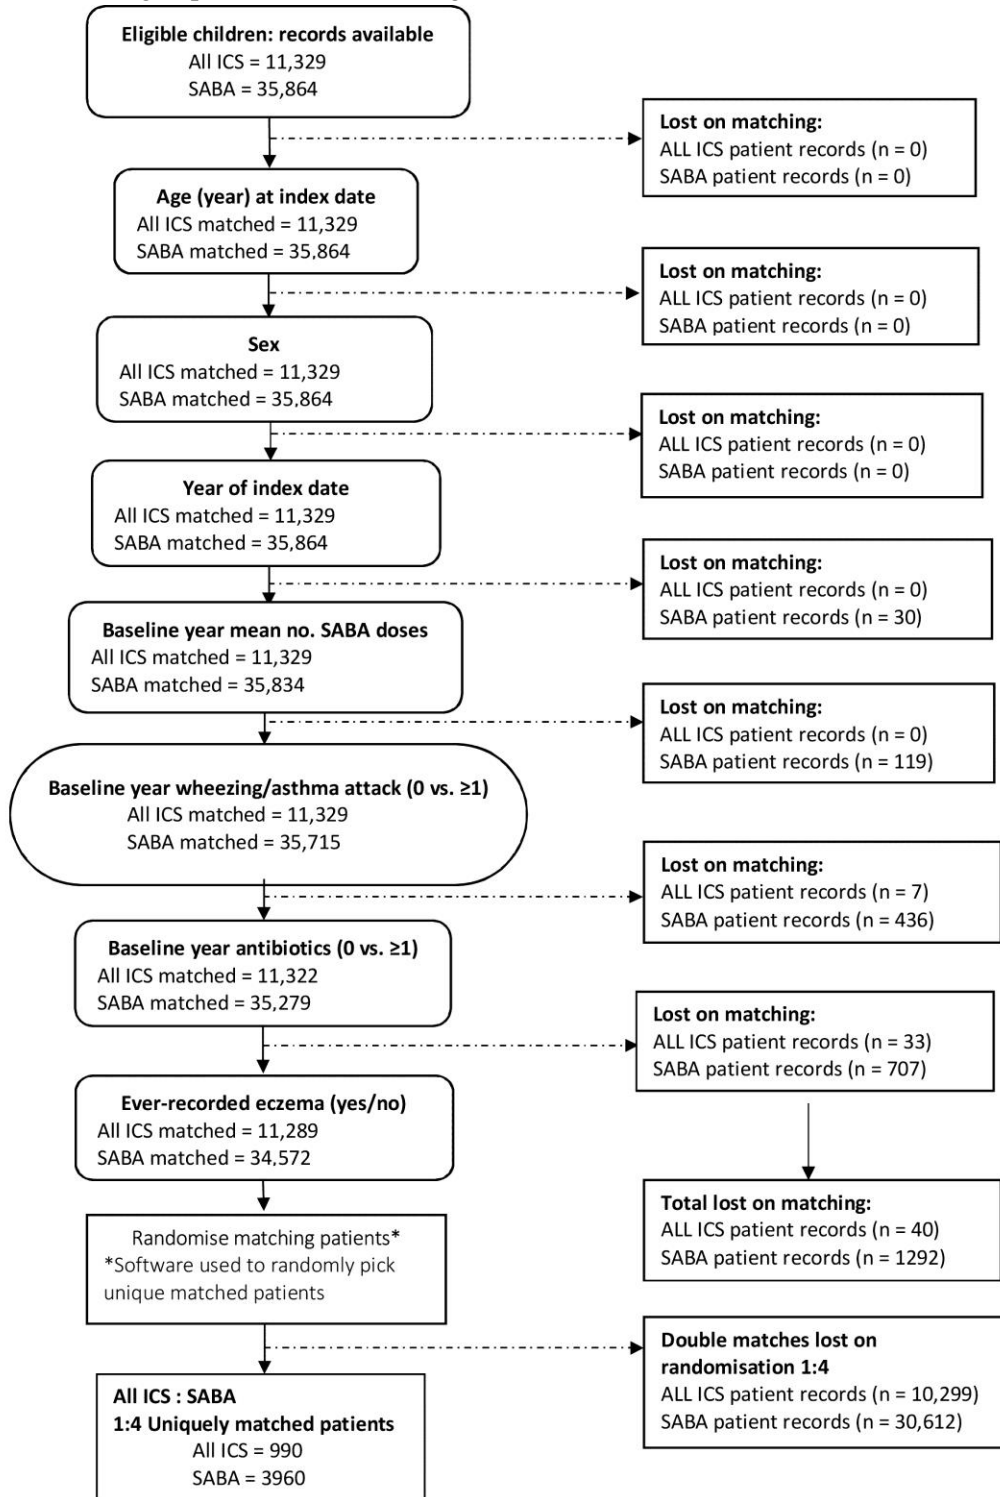

**Figure S2.** Patient flow chart: leukotriene receptor antagonist (LTRA) vs. short-acting  $\beta$ -agonist (SABA) comparison.

The numbers for the LTRA cohort represent the actual number of children, while the numbers for the SABA cohort represent the number of medical records with different potential index dates for matching (there were 12,373 eligible children in the SABA cohort). The final step was the random selection of matched pairs, excluding duplicate matches, through the use of custom software.

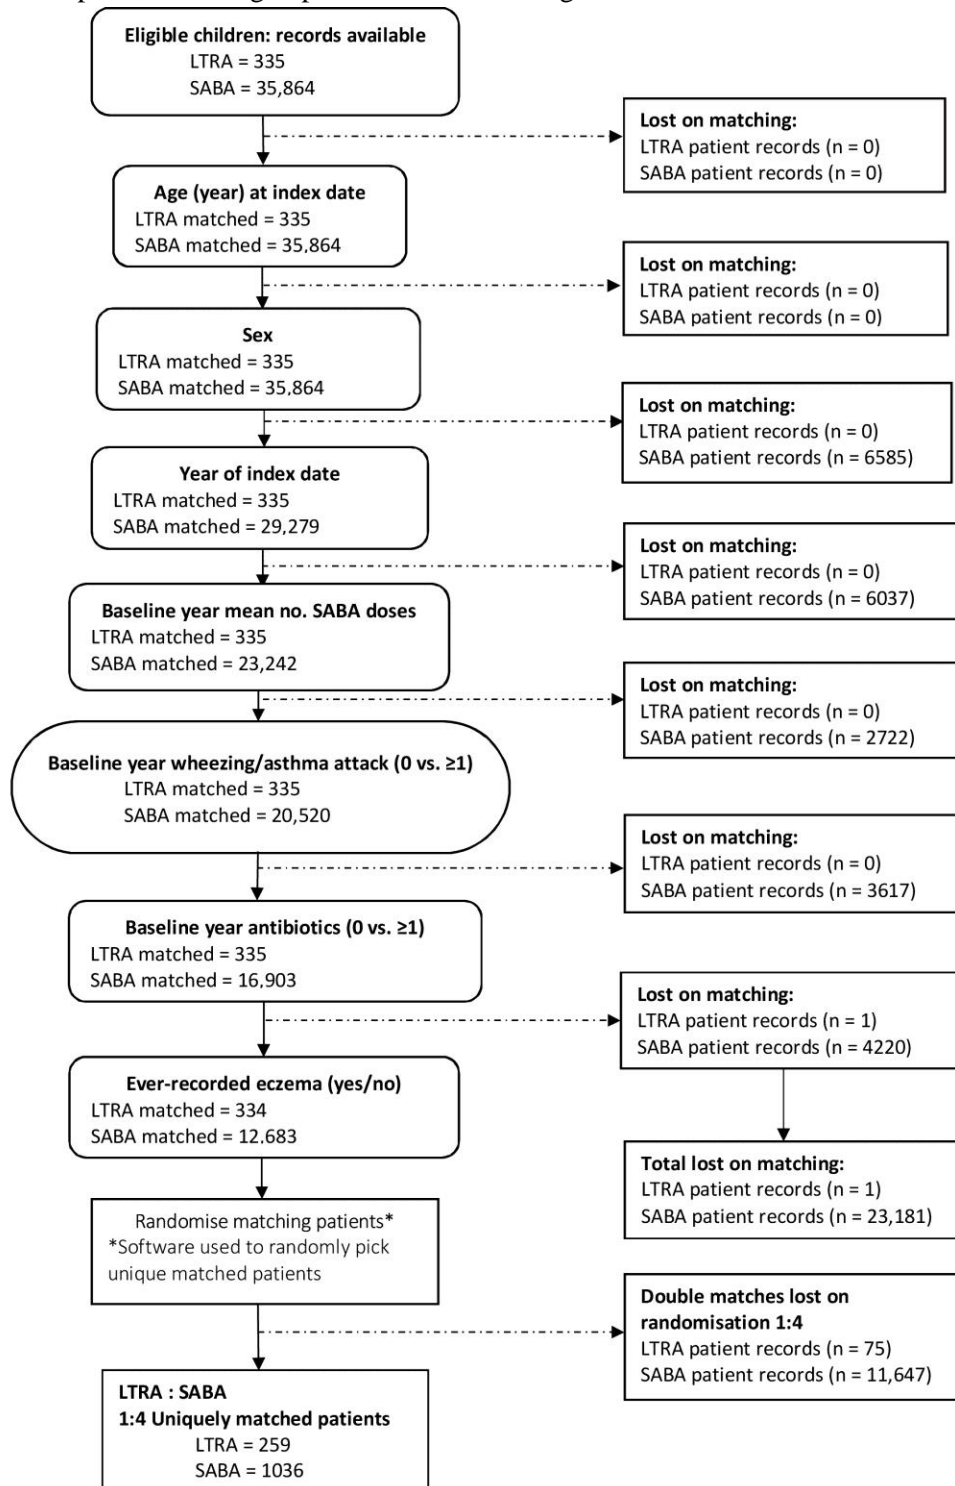



**Figure S3.** Patient flow chart: leukotriene receptor antagonist (LTRA) vs. inhaled corticosteroid (ICS) comparison. The numbers for the ICS and LTRA cohorts represent the actual number of children. The final step was the random selection of matched pairs, excluding duplicate matches, through the use of custom software.

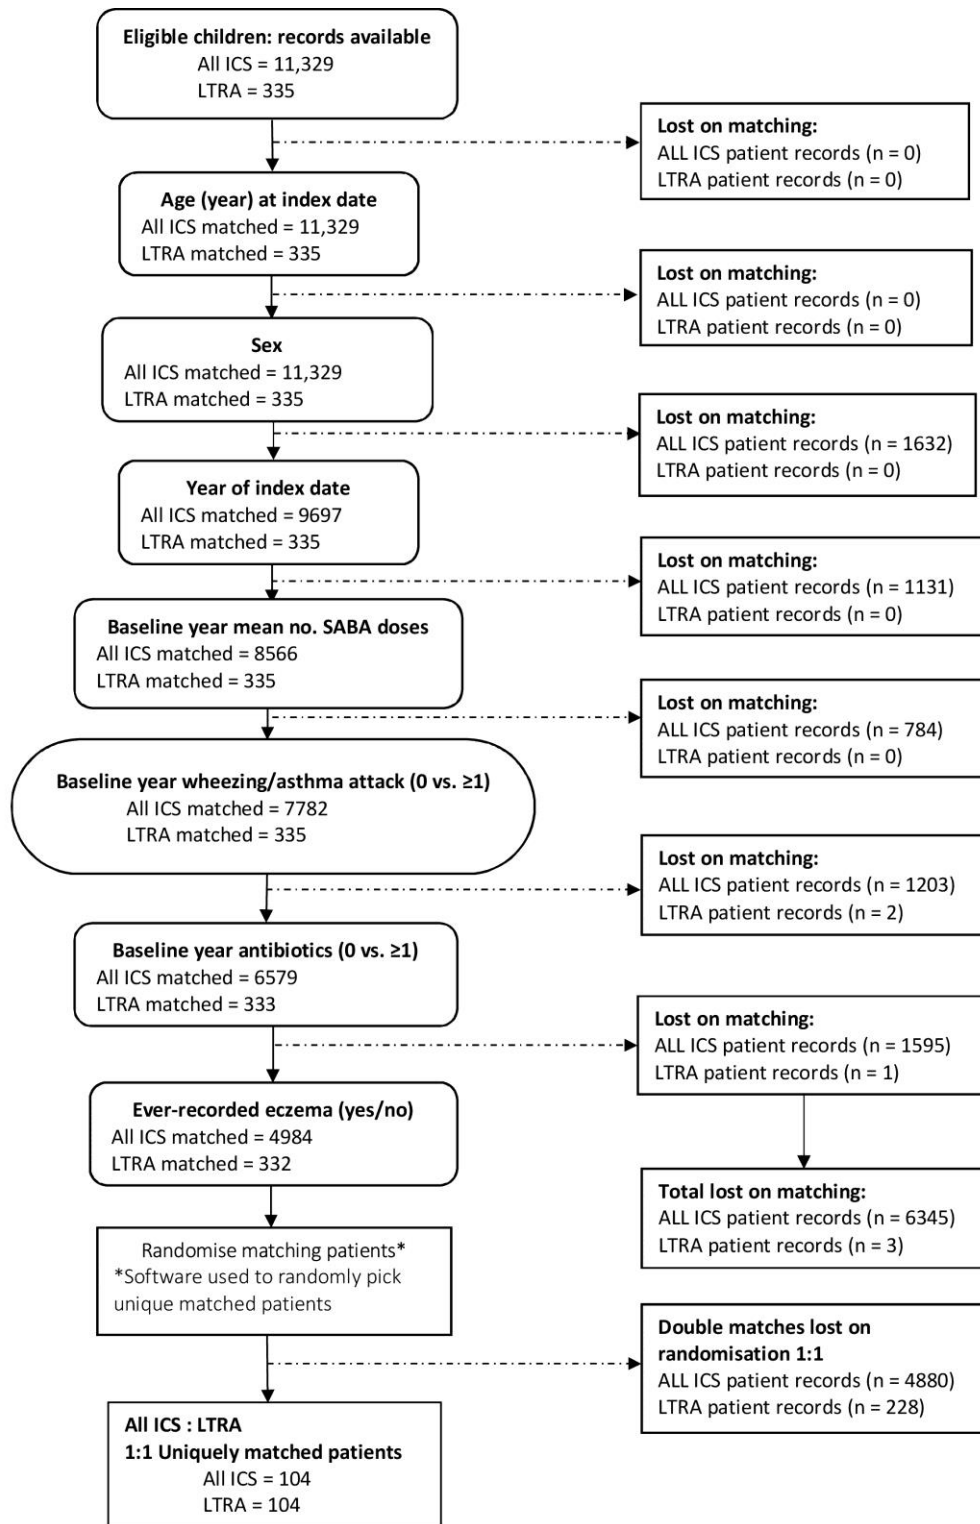

**Figure S4.** Patient flow chart: extrafine-particle inhaled corticosteroid (ICS) vs. fine-particle ICS comparison. The numbers for the extrafine-particle and fine-particle ICS cohorts represent the actual number of children. The final step was the random selection of matched pairs, excluding duplicate matches, through the use of custom software.

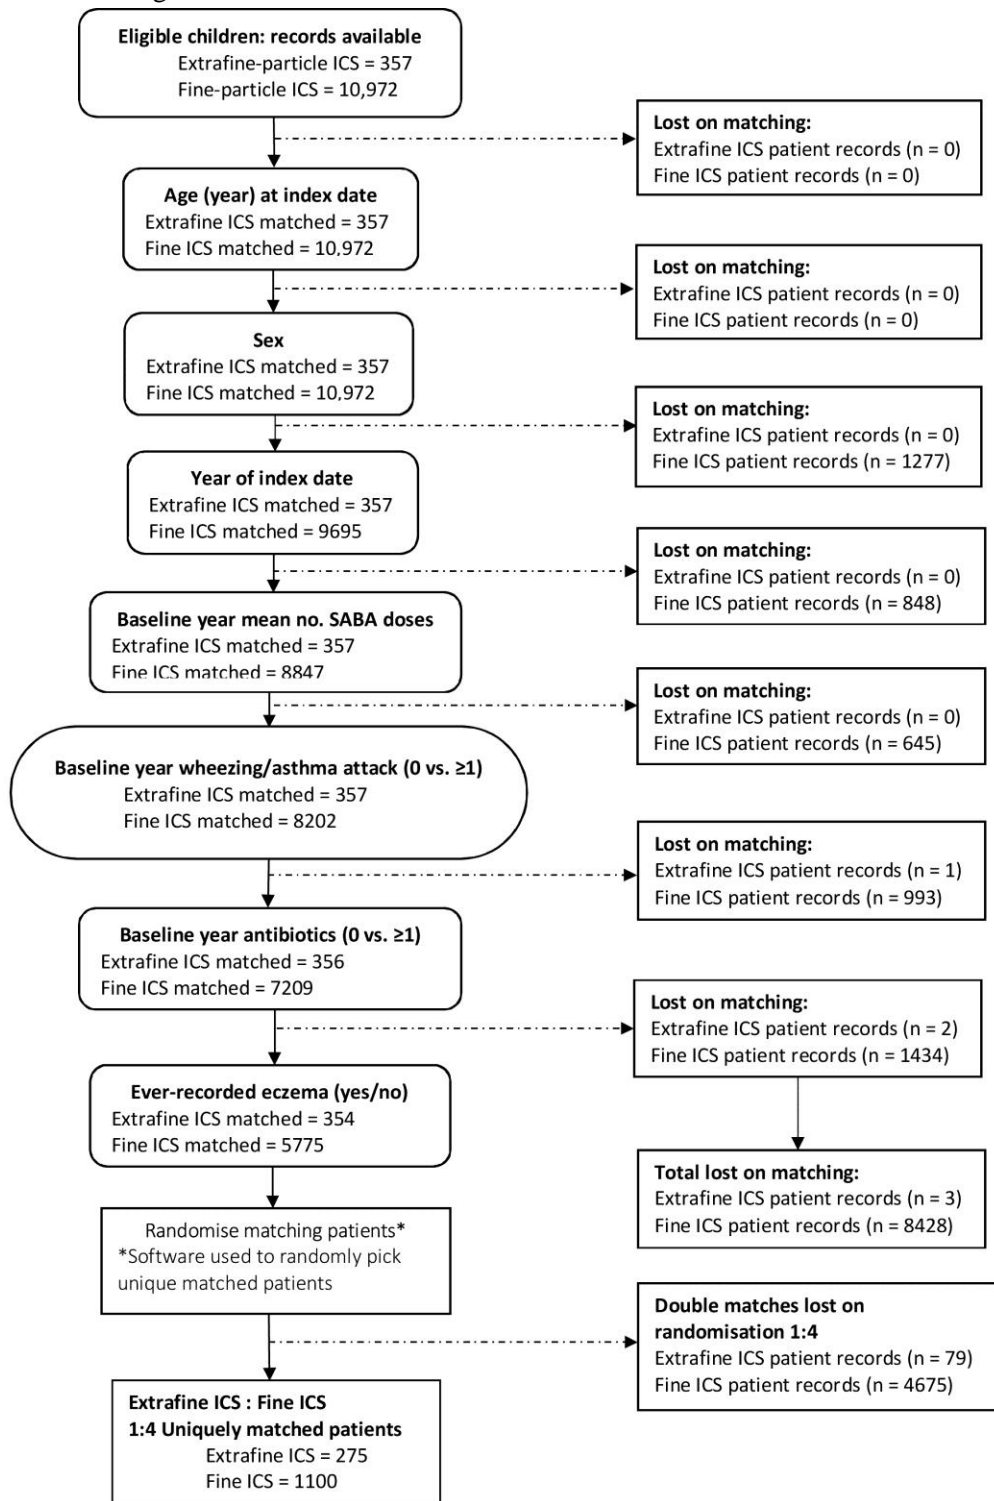

**Table S2.** Additional outcome measures for the controller vs. SABA comparisons during the outcome year: ICS vs. SABA and LTRA vs. SABA

| Outcome                                        | ICS vs. SABA     |                  |                                  | LTRA vs. SABA    |                  |                                  |
|------------------------------------------------|------------------|------------------|----------------------------------|------------------|------------------|----------------------------------|
|                                                | ICS<br>(n=990)   | SABA<br>(n=3960) | <i>p</i> -<br>Value <sup>a</sup> | LTRA<br>(n=259)  | SABA<br>(n=1036) | <i>p</i> -<br>Value <sup>a</sup> |
| ≥1 Acute respiratory event, n (%)              | 467 (47.2)       | 1861 (47.0)      | 0.92                             | 154 (59.5)       | 606 (58.5)       | 0.77                             |
| Risk-domain asthma control, n (%)              | 523 (52.8)       | 2099 (53.0)      | 0.92                             | 105 (40.5)       | 430 (41.5)       | 0.77                             |
| Treatment stability, n (%)                     | 448 (45.3)       | 2052 (51.8)      | <0.001                           | 104 (40.2)       | 412 (39.8)       | 0.91                             |
| Acute antibiotic prescription, n (%)           |                  |                  |                                  |                  |                  |                                  |
| 0                                              | 646 (65.3)       | 2590 (65.4)      | 0.92                             | 147 (56.8)       | 574 (55.4)       | 0.68                             |
| 1                                              | 210 (21.2)       | 839 (21.2)       |                                  | 61 (23.6)        | 267 (25.8)       |                                  |
| 2                                              | 79 (8.0)         | 323 (8.2)        |                                  | 24 (9.3)         | 120 (11.6)       |                                  |
| 3                                              | 33 (3.3)         | 127 (3.2)        |                                  | 0                | 0                |                                  |
| ≥4                                             | 22 (2.2)         | 81 (2.0)         |                                  | 15 (5.8)         | 26 (2.5)         |                                  |
| Mean (SD) daily no. SABA doses <sup>b</sup>    | 1.10 (0.93)      | 1.29 (0.91)      | 1.0                              | 1.15 (0.92)      | 1.32 (0.92)      | 0.004                            |
| Median (IQR) daily no. SABA doses <sup>b</sup> | 0.82 (0.55–1.37) | 1.09 (0.55–1.64) |                                  | 0.82 (0.55–1.64) | 1.1 (0.82–1.64)  |                                  |
| Median (IQR) daily ICS dose, µg/d <sup>c</sup> | 68 (41–109)      | 13 (0–54)        | <0.001                           | 27 (0–68)        | 13 (0–48)        | <0.001                           |
| Spacer prescription, n (%) <sup>d</sup>        | 313 (31.6)       | 1096 (27.7)      | n/a                              | 84 (32.8)        | 354 (34.2)       | n/a                              |
| Oral candidiasis, ≥1, n (%)                    | 9 (0.9)          | 32 (0.8)         | 0.75                             | 7 (2.7)          | 10 (1.0)         | 0.037                            |
| Pneumonia, n (%)                               | 2 (0.2)          | 25 (0.6)         | 0.12                             | 3 (1.2)          | 7 (0.7)          | 0.44                             |

**Notes:** <sup>a</sup>Matched cohorts were compared using conditional logistic regression.<sup>b</sup>The number of SABA doses in issued prescriptions were averaged during the outcome year. One SABA dose was defined as 200 µg (two puffs).

<sup>c</sup>The median daily ICS dose exposure during the outcome year was calculated using the total ICS dose in prescriptions over 365 days. The doses of ICS were standardized to equivalence with fluticasone; thus, the actual doses of fluticasone, ciclesonide, and extrafine-particle beclomethasone were used, and doses of budesonide and non-extrafine beclomethasone were halved.

<sup>d</sup>The count of spacer prescriptions included those on the index date or during the outcome year (not during baseline year).

**Abbreviations:** ICS, inhaled corticosteroid; IQR, interquartile range; LTRA, leukotriene receptor antagonist; n/a, not assessed; SABA, short-acting  $\beta$ -agonist.

**Table S3.** Additional outcome measures during the outcome year: LTRA versus ICS and extrafine (EF) ICS versus fine-particle ICS

| Outcome                                                      | LTRA vs. ICS    |                  |                                  | EF ICS vs. fine-particle ICS |                               |                                  |
|--------------------------------------------------------------|-----------------|------------------|----------------------------------|------------------------------|-------------------------------|----------------------------------|
|                                                              | LTRA<br>(n=104) | ICS<br>(n=104)   | <i>p</i> -<br>Value <sup>a</sup> | EF ICS<br>(n=275)            | Fine-particle ICS<br>(n=1100) | <i>p</i> -<br>Value <sup>a</sup> |
| ≥1 Acute respiratory event, n (%)                            | 68 (65.4)       | 63 (60.6)        | 0.49                             | 99 (36.0)                    | 366 (33.3)                    | 0.76                             |
| Risk-domain asthma control, n (%)                            | 36 (34.6)       | 41 (39.4)        | 0.49                             | 128 (46.5)                   | 523 (47.5)                    | 0.76                             |
| Treatment stability, n (%) <sup>b</sup>                      | 36 (34.6)       | 38 (36.5)        | 0.78                             | 115 (41.8)                   | 451 (41.0)                    | 0.80                             |
| Acute antibiotic prescription                                |                 |                  |                                  |                              |                               |                                  |
| 0                                                            | 55 (52.9)       | 56 (53.9)        | 0.90                             | 175 (63.6)                   | 684 (62.2)                    | 0.64                             |
| 1                                                            | 28 (26.9)       | 29 (27.9)        |                                  | 57 (20.7)                    | 242 (22.0)                    |                                  |
| 2                                                            | 7 (6.7)         | 15 (14.4)        |                                  | 30 (10.9)                    | 110 (10.0)                    |                                  |
| 3                                                            | 8 (7.7)         | 3 (2.9)          |                                  | 9 (3.3)                      | 38 (3.5)                      |                                  |
| ≥4                                                           | 7 (6.7)         | 1 (1.0)          |                                  | 4 (1.5)                      | 26 (2.4)                      |                                  |
| Mean (SD) daily no. SABA doses <sup>c</sup>                  | 1.20 (0.81)     | 1.02 (0.82)      | 0.12                             | 1.1 (0.9)                    | 1.1 (0.9)                     | 0.74                             |
| Median (IQR) daily no. SABA doses                            | 1.1 (0.55–1.64) | 0.82 (0.55–1.37) |                                  | 0.82 (0.55–1.37)             | 0.82 (0.55–1.37)              |                                  |
| Median (IQR) daily ICS dose, µg/d <sup>d</sup>               | 55 (0–131)      | 110 (82–192)     | <0.001                           | 137 (82–219)                 | 219 (164–328)                 | <0.001                           |
| Controller:total asthma medication ratio, n (%) <sup>b</sup> |                 |                  |                                  |                              |                               |                                  |
| <0.5                                                         | 22 (21.1)       | 5 (4.8)          | 0.31                             | 7 (2.7)                      | 37 (3.6)                      | 0.49                             |
| ≥0.5                                                         | 77 (74.0)       | 88 (84.6)        |                                  | 250 (97.3)                   | 997 (96.4)                    |                                  |
| Spacer prescription, n (%) <sup>e</sup>                      | 39 (37.5)       | 32 (30.8)        | n/a                              | 116 (42.2)                   | 391 (35.5)                    | n/a                              |

|                                    |         |         |      |         |          |      |
|------------------------------------|---------|---------|------|---------|----------|------|
| Oral candidiasis, $\geq 1$ , n (%) | 4 (3.8) | 1 (1.0) | 0.22 | 2 (0.7) | 10 (0.8) | 0.77 |
| Pneumonia, n (%)                   | 2 (1.9) | 0       | n/a  | 3 (1.1) | 9 (0.8)  | 0.67 |

**Notes:** <sup>a</sup>Matched cohorts were compared using conditional logistic regression.

<sup>b</sup>Treatment stability data were missing for 42 (15.3%) and 210 (19.1%) children in EF ICS and fine-particle ICS cohorts, respectively, and for 14 (13.5%) in the ICS cohort. Controller:total asthma medication ratio data were missing for 65 (5.9%) children in the fine-particle ICS cohort and for 5 (4.8%) and 11 (10.6%) children in LTRA and ICS cohorts, respectively.

<sup>c</sup>The number of SABA doses in issued prescriptions were averaged during the outcome year. One SABA dose was defined as 200  $\mu$ g (two puffs).

<sup>d</sup>The median daily ICS dose exposure during the outcome year was calculated using the total ICS dose in prescriptions over 365 days. The doses of ICS were standardized to equivalence with fluticasone; thus, the actual doses of fluticasone, ciclesonide, and extrafine-particle beclomethasone were used, and doses of budesonide and non-extrafine beclomethasone were halved.

<sup>e</sup>The count of spacer prescriptions included those on the index date or during the outcome year (not during baseline year).

**Abbreviations:** EF, extrafine; ICS, inhaled corticosteroid; IQR, interquartile range; LTRA, leukotriene receptor antagonist; n/a, not assessed; SABA, short-acting  $\beta$ -agonist.

**Figure S5.** Time to first wheezing/asthma attack (exacerbation): inhaled corticosteroid (ICS) vs. short-acting  $\beta$ -agonist (SABA). Children who experienced treatment failure (addition of new therapy or  $\geq 50\%$  increase in dose of index date therapy) before an attack were censored at 7 days after the date of treatment failure.

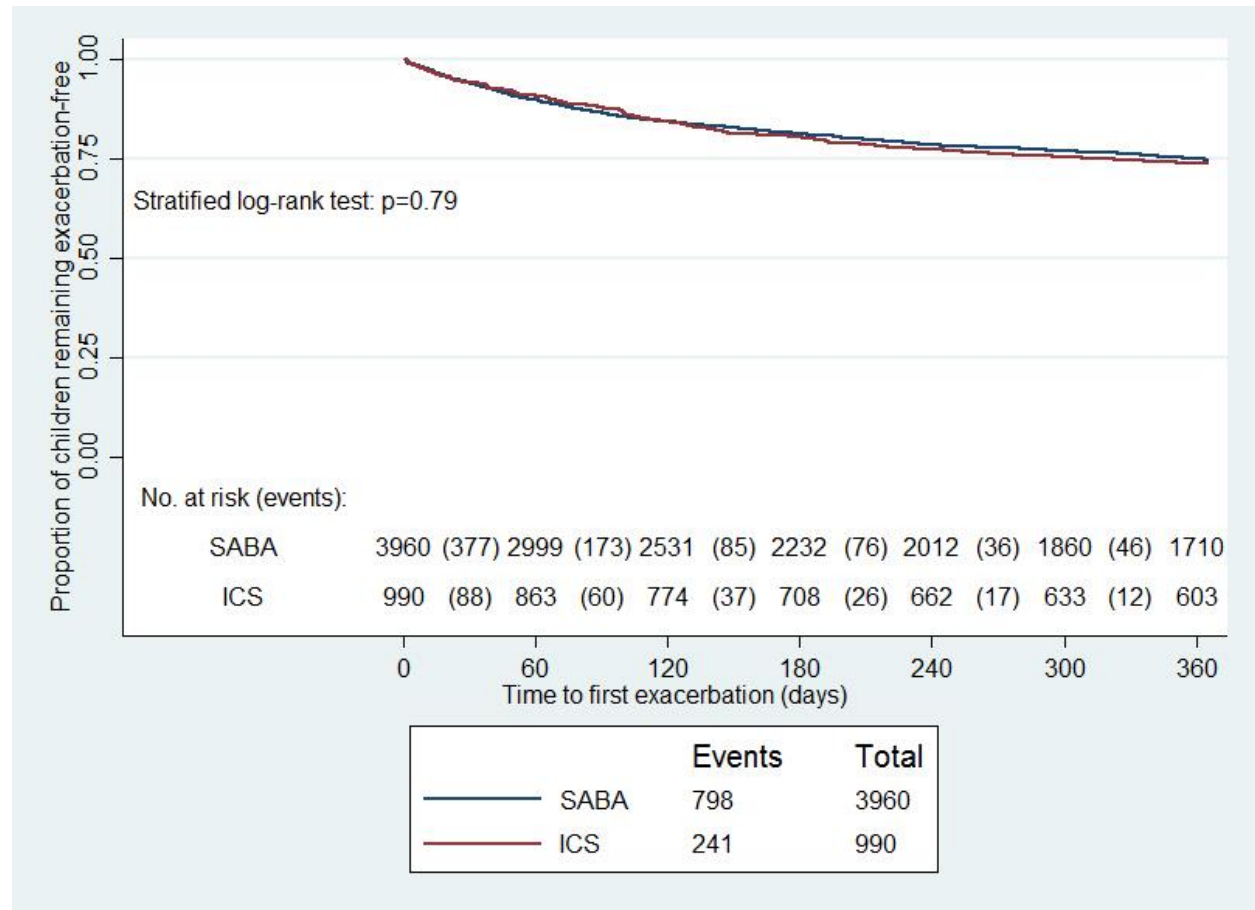

**Figure S6.** Time to first wheezing/asthma attack (exacerbation): leukotriene receptor antagonist (LTRA) vs. short-acting  $\beta$ -agonist (SABA). Children who experienced treatment failure (addition of new therapy or  $\geq 50\%$  increase in dose of index date therapy) before an attack were censored at 7 days after the date of treatment failure.

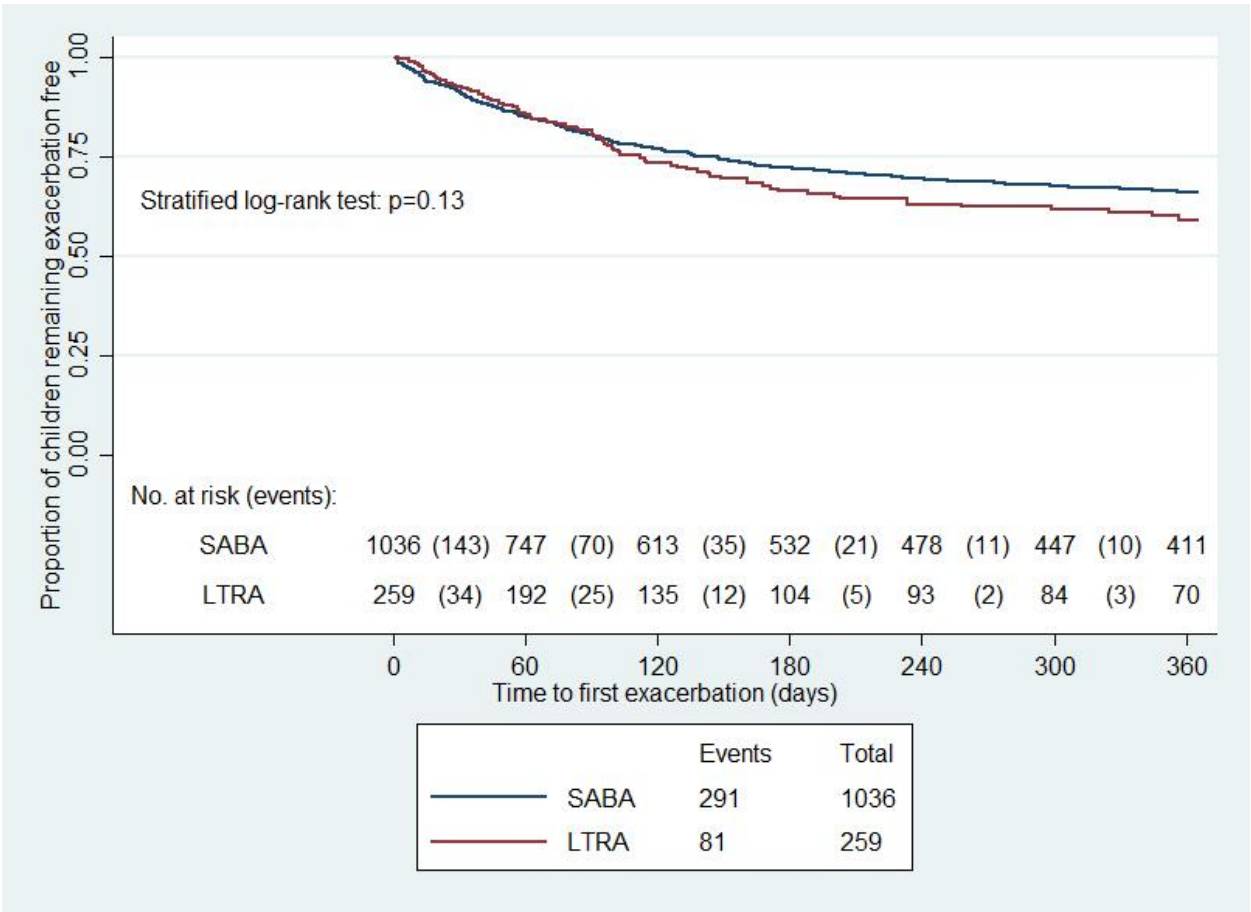



**Figure S7.** Time to first wheezing/asthma attack (exacerbation): leukotriene receptor antagonist (LTRA) vs. inhaled corticosteroid (ICS). Children who experienced treatment failure (addition of new therapy or  $\geq 50\%$  increase in dose of index date therapy) before an attack were censored at 7 days after the date of treatment failure.

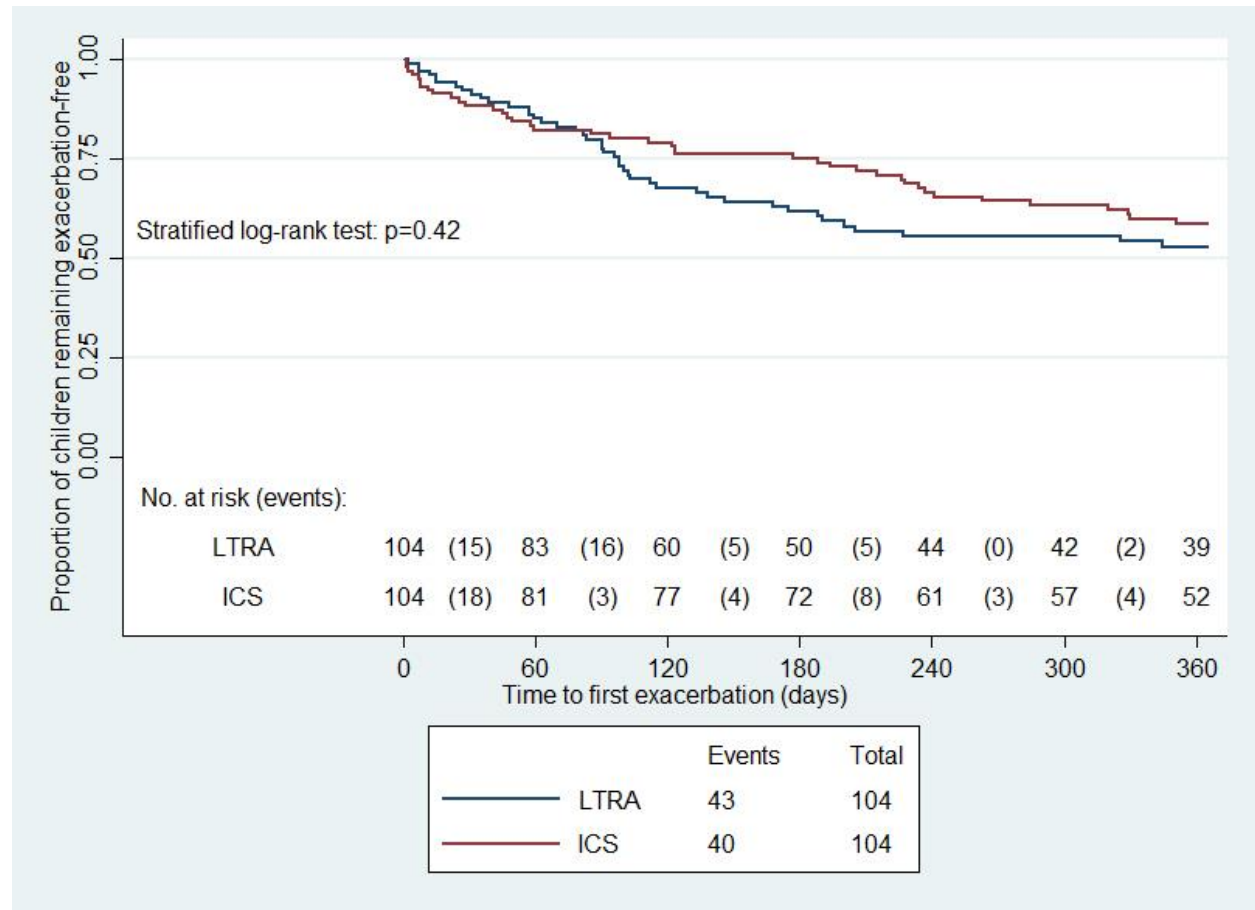

**Figure S8.** Time to first wheezing/asthma attack (exacerbation): extrafine-particle inhaled corticosteroid (EF ICS) vs. fine-particle (FP) ICS. Children who experienced treatment failure (addition of new therapy or  $\geq 50\%$  increase in dose of index date therapy) before an attack were censored at 7 days after the date of treatment failure.

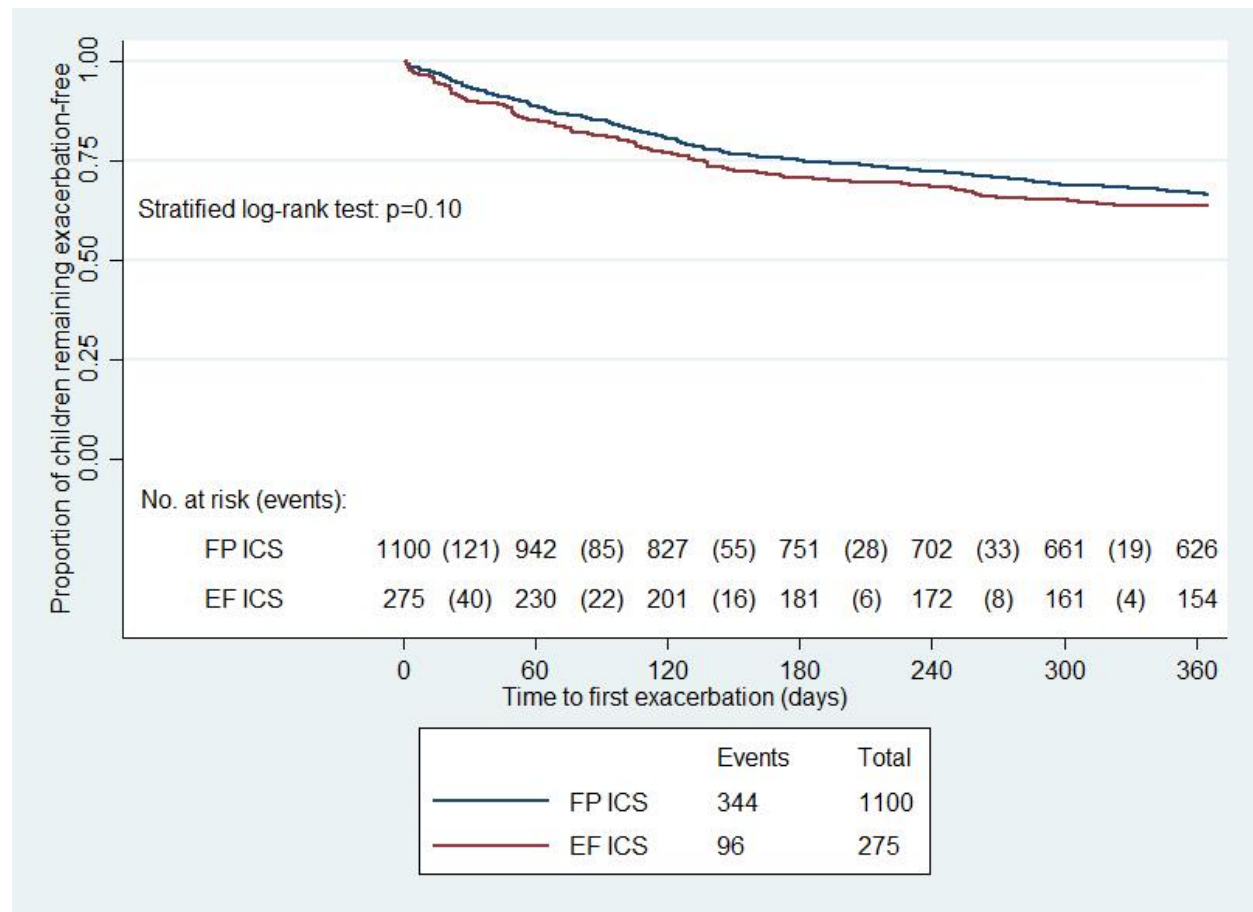

Supplement: Supplementary file 1 [file get_supplementary_file.php]
